# Supplementary material for: Heterogeneous growth of palladium nanocrystals on upconversion nanoparticles for multimodal imaging and photothermal therapy
Source: Royal Society of Chemistry journal article supplement (doi:10.1039/c9tb00317g), 2019-01-01
Supplement: c9tb00317g1.pdf [file c9tb00317g1.pdf]

## Supporting Information

### **Heterogeneous Growth of Palladium Nanocrystals on Upconversion Nanoparticles for Multimodal Imaging and Photothermal Therapy**

**Huijun Zhao,<sup>‡a</sup> Lei Zhao,<sup>‡a</sup> Zhuo Wang,<sup>b</sup> Wensong Xi,<sup>c</sup> Solomon Tiruneh Dibaba,<sup>d</sup> Shuhan Wang,<sup>a</sup> Liyi Shi,<sup>a</sup> Lining Sun<sup>\*a</sup>**

<sup>a</sup> *Research Center of Nano Science and Technology, and School of Material Science and Engineering, Shanghai University, Shanghai 200444, China. \*E-mail: [lnsun@shu.edu.cn](mailto:lnsun@shu.edu.cn); Tel: +86-21-66137153*

<sup>b</sup> *State Key Laboratory of Marine Resource Utilization in South China Sea & Special Glass Key Lab of Hainan Province, Hainan University, Haikou 570228, China*

<sup>c</sup> *Institute of Nanochemistry and Nanobiology, Shanghai University, Shanghai 200444, China*

<sup>d</sup> *Physics Department, International Centre for Quantum and Molecular Structures, Shanghai University, Shanghai 200444, China*

<sup>‡</sup> Huijun Zhao and Lei Zhao contributed equally to this work.

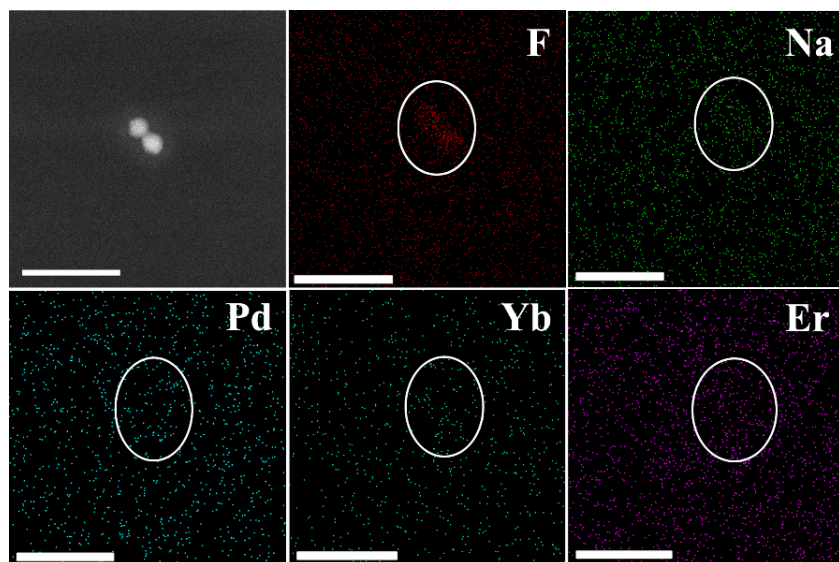

**Fig. S1.** Elemental mapping images (elemental color distribution, F, Na, Pd, Yb, and Er) of UCNPs@Pd-PVP nanocomposites.

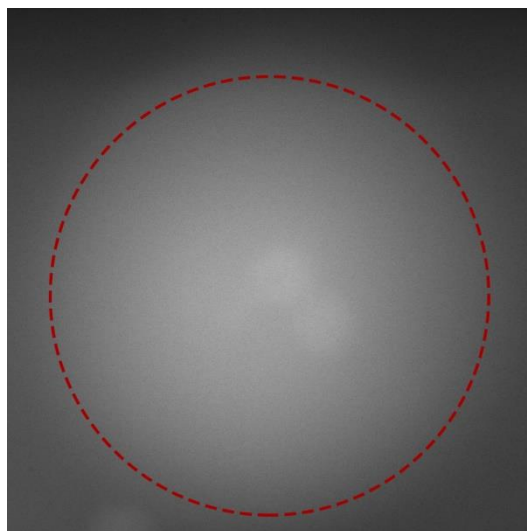

**Fig. S2.** Scanning transmission electron microscope-High angle annular dark field (STEM-HAADF) image of UCNPs@Pd-PVP nanocomposites.

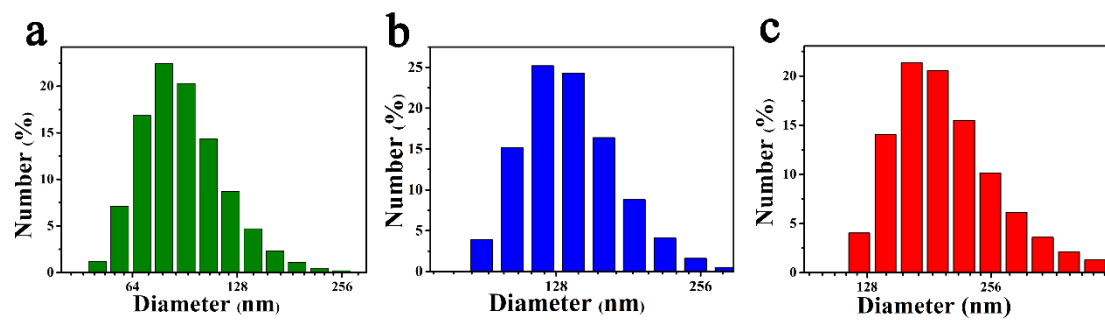

**Fig. S3.** Dynamic Light Scattering (DLS) of UCNPs (a), UCNPs@Pd (b), and UCNPs@Pd-PVP (c) in water. The polydispersity index (PDI) of Fig. S3 a-c is 0.195, 0.115, and 0.211, respectively.

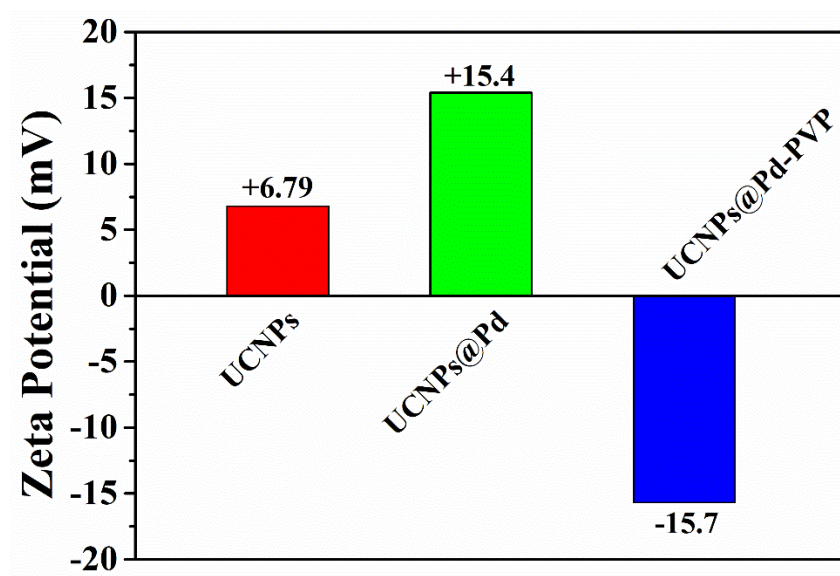

**Fig. S4.** The zeta potentials of UCNPs, UCNPs@Pd, and UCNPs@Pd-PVP in water, respectively.

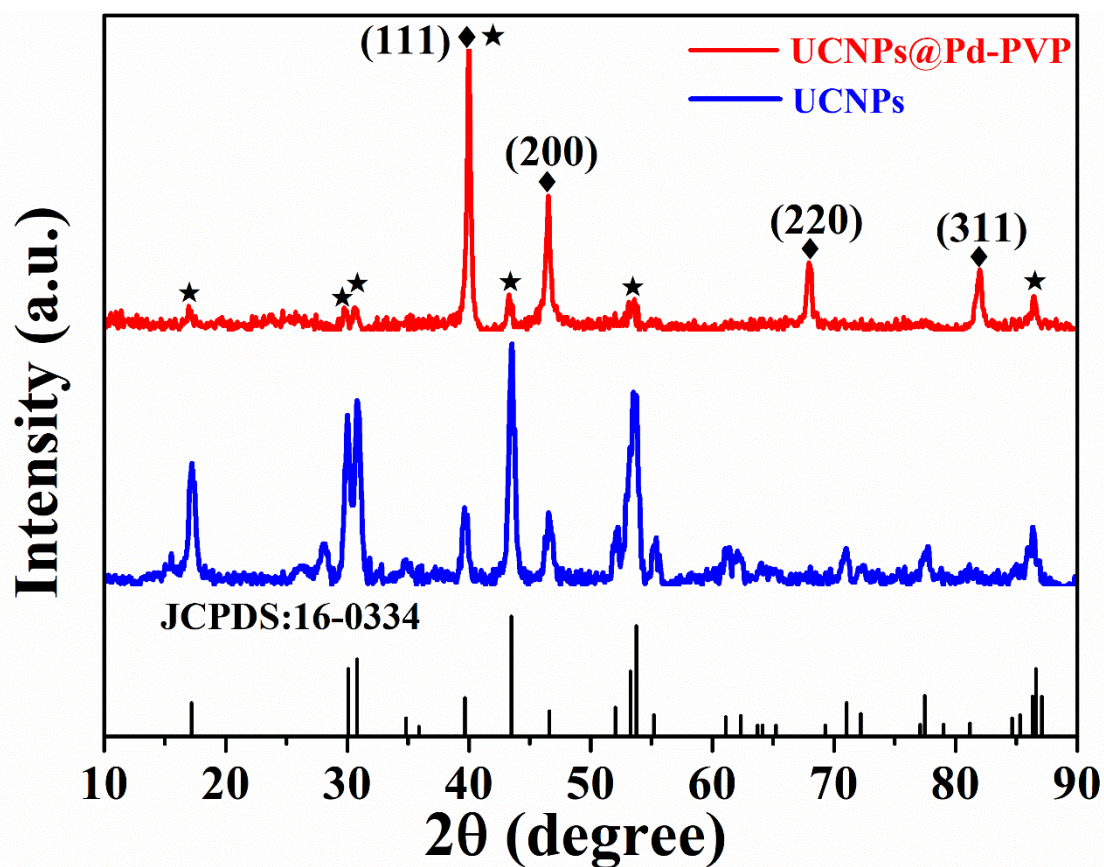

**Fig. S5.** The X-ray diffraction (XRD) patterns of UCNPs, UCNPs@Pd-PVP, and the standard card of  $\beta$ -NaYF<sub>4</sub> (JCPDS: 16-0334). ◆: the peaks of palladium nanocrystal, ★: the peaks of UCNPs.

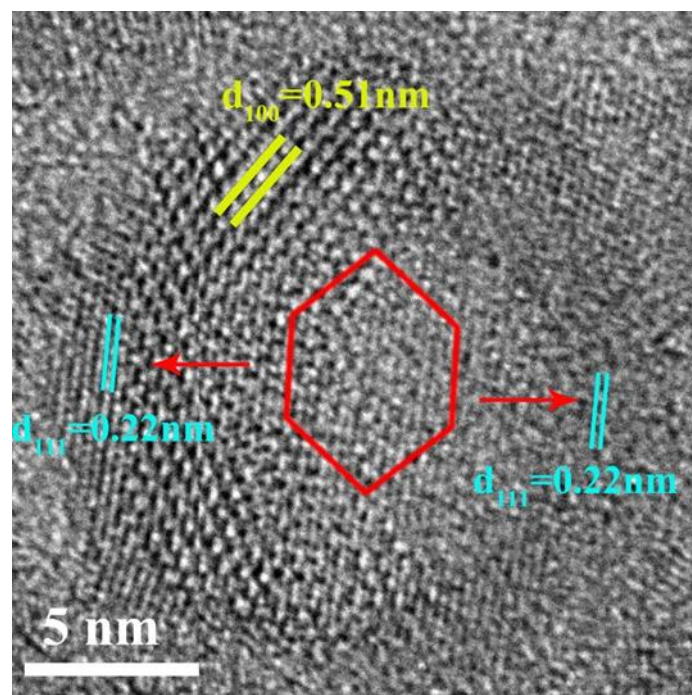

**Fig. S6.** High-resolution TEM (HRTEM) image of UCNPs@Pd-PVP nanocomposites. The red arrow indicates the direction of parallel growth of Pd on the UCNPs.

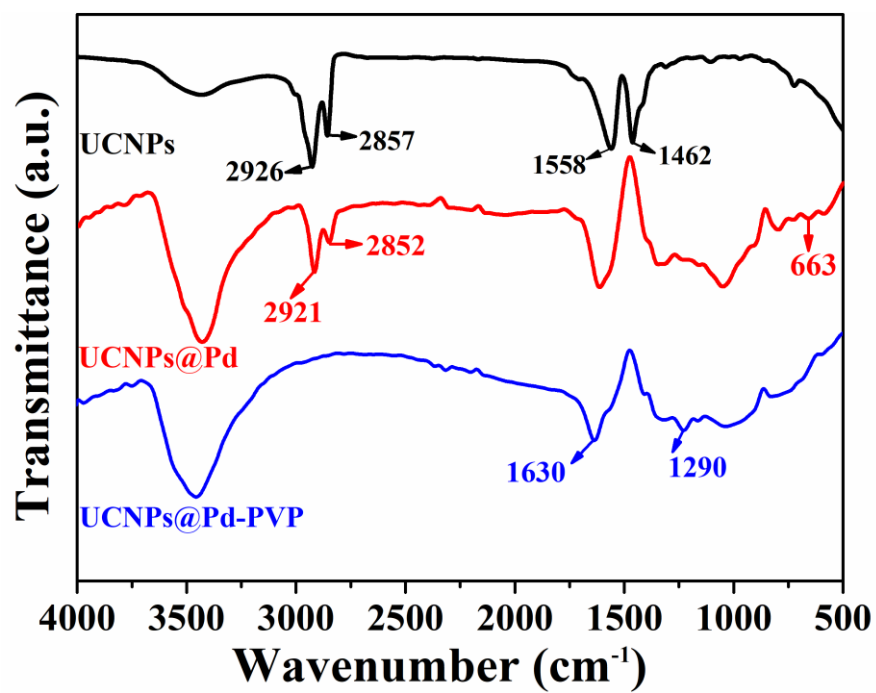

**Fig. S7.** FTIR spectra of UCNPs, UCNPs@Pd, and UCNPs@Pd-PVP.



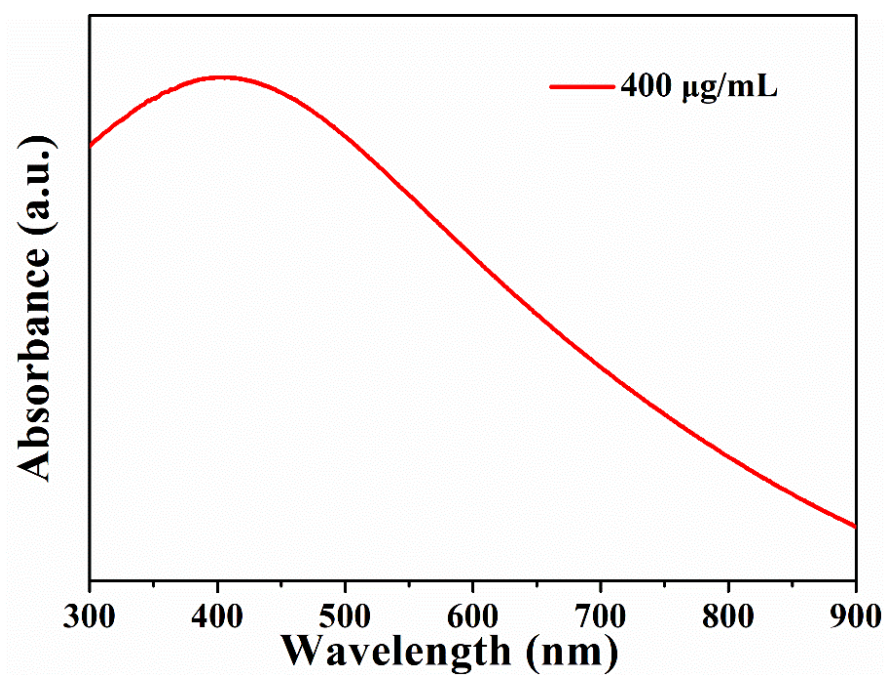

**Fig. S8.** UV-visible absorption spectrum of UCNPs@Pd-PVP nanocomposites in water (400 µg/mL).

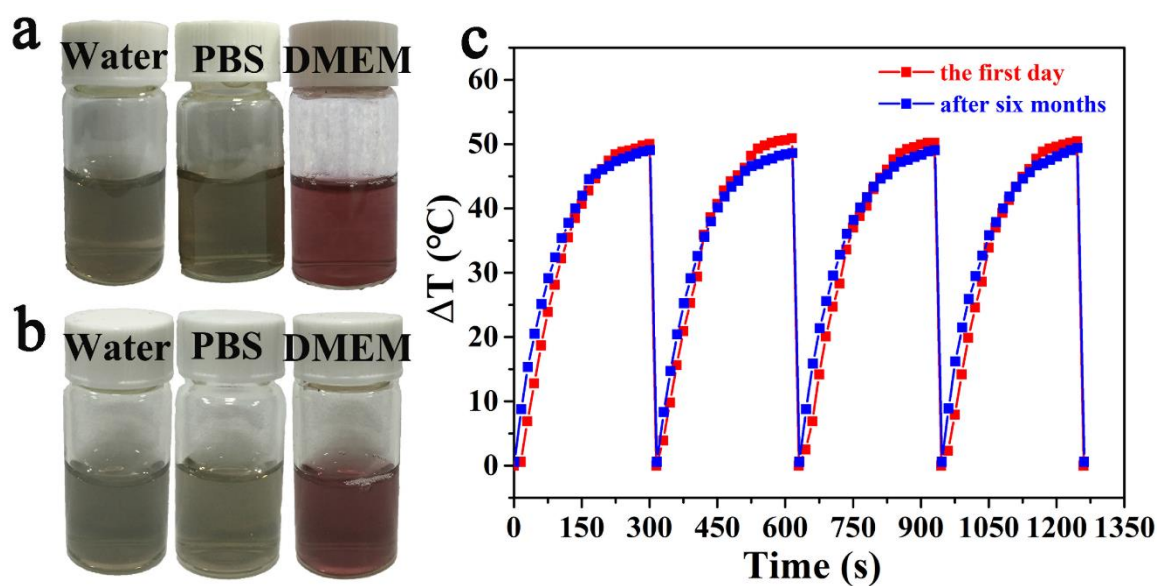

**Fig. S9.** The photos of UCNPs@Pd-PVP nanocomposites in water, PBS (pH = 7.4), and DMEM culture solution, respectively (a) and after being placed in the lab at room temperature for one week (b), and the photothermal stability of UCNPs@Pd-PVP nanocomposites in water (400  $\mu\text{g/mL}$ ) for four laser on/off cycles on the first day and after being placed for six months, respectively (c).

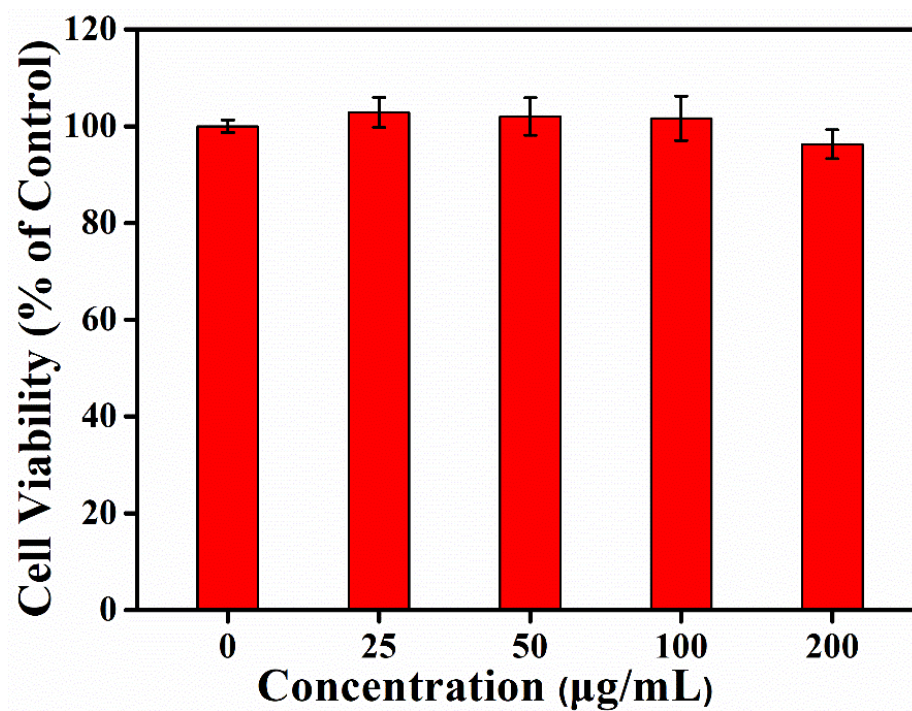

**Fig. S10.** Viability of HeLa cells treated with UCNPs@Pd-PVP nanocomposites (0, 25, 50, 100, and 200 µg/mL) for 24 h.

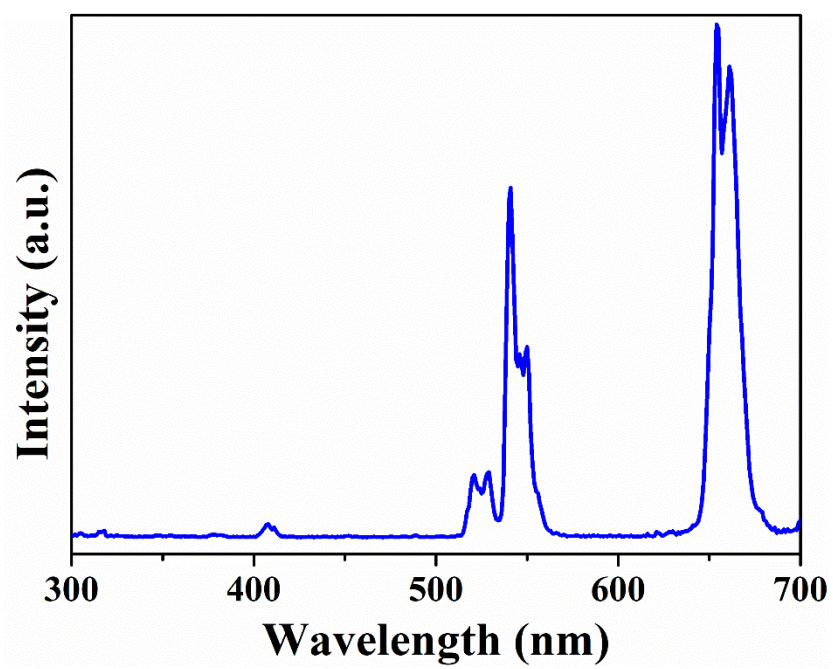

**Fig. S11.** Upconversion luminescence (UCL) spectrum of UCNPs@Pd-PVP nanocomposites (excited at 980 nm)
